# Supplementary material for: A fluorescence nanosensor for Cu2+ on silica particlesElectronic supplementary information (ESI) available: experimental procedure; TEM images; NMR, UV-vis and fluorescence spectra; fluoresence titration. See http://www.rsc.org/suppdata/cc/b3/b310582b/
Source: Royal Society of Chemistry journal article supplement (doi:10.1039/b310582b), 2003-01-01
Supplement: b310582b.doc [file b310582b.doc]

## Supplementary Information

A fluorescence nanosensor for Cu2+ on silica particles

Elena Brasola,*a* Fabrizio Mancin,*a* Enrico Rampazzo,*a* Paolo Tecilla**b* and Umberto Tonellato**a*

a Dipartimento di Chimica Organica and Istituto CNR di Tecnologia delle Membrane - Sezione di Padova, Università di Padova, via Marzolo 1, I -35131 Padova, Italy. Fax: +39 0498275239; Tel: +39 0498275269; E-mail: umberto.tonellato@unipd.it

b Dipartimento di Scienze Chimiche,Università di Trieste, via Giorgieri 1, I-34127, Italy. Fax: +39 0405583903; Tel:+39 0405583925; E-mail: tecilla@dsch.univ.trieste.

(Total 8 pages including this cover page)

#### Table of Contents

1. Experimental Procedures 2

2. Synthesis 3

3. TEM images of CSNs 5

4. NMR, UV-Visible and fluorescence spectra of CSNs …7

5. Fluorescence titration of CSNs with Cu2+ in the presence of other metal ions 8

**1. Experimental Procedures.**

**General:** Solvents were purified by standard methods. All commercially available reagents and substrates were used as received. TLC analyses were performed using Merck 60 F254 precoated silica gel glass plates. Column chromatography was carried out on Macherey-Nagel silica gel 60 (70-230 mesh). NMR spectra were recorded using a Bruker AC250F. Chemical shifts are reported relative to internal Me4Si. Multiplicity is given as usual. Elemental analyses were performed by the Laboratorio di Microanalisi of the Inorganic and Analytic Chemistry Department of the University of Padova. UV-Vis absorption measurements were performed on a Perkin Helmer Lambda 16 spectrophotometer equipped with a thermostated cell holder. Fluorescence spectra were recorded on a Perkin Elmer LS-50B spectrometer equipped with a thermostated cell holder (1 cm quartz cells). Cu(NO3)2, Zn(NO3)2, Ni(NO3)2, CoCl2, Fe(NO3)2, CdCl2, Pb(NO3)2 CaCl2 and MgCl2 were analytical grade products. Metal ion stock solutions were titrated against EDTA following standard procedures. The buffer 4-(2-hydroxyethyl)-1-piperazineethanesulfonic acid (HEPES, Sigma) was used as supplied by the manufacturers.

**Spectrometric titrations:** Stock solutions of CSNs were prepared in CHCl3. The total concentration of **1** subunits was determined from the absorbance a 340 nm using the  value (4650 ± 30 M-1 cm-1) of N-propyl-dansylamide. The total concentration of **2** subunits was calculated using the **1** to **2** ratio determined by 1H-NMR (see infra). The desired amount of CHCl3 solution was then transferred in a volumetric flask, the solvent was evaporated under a gentle N2 stream and the CSNs were redissolved in DMSO (90%) and water (10%) buffered at pH 7.0 (HEPES, 0.01 M). 2 mL aliquots of these solutions were transferred in fluorescence quartz cells, small volumes (up to 50 L) of concentrated metal ions solutions were added and the fluorescence spectra were recorded.

**TEM Experiments.** Transmission Electron Microscopy (TEM) experiments were performed by Mr. Claudio Gamboz and Prof. Maria Rosa Soranzo at the CSPA of the University of Trieste. TEM images of the particles were obtained with a Philips EM 208 transmission electron microscope operating at 100 KeV. Samples for TEM were prepared by spreading a drop of nanoparticles solution in CHCl3 (~ 5mg/mL) onto standard carbon-coated copper grids (200 mesh).

**2. Synthesis**

**2.1 Synthesis of derivative 1 [3-(Dansylamido)propyl-trimethoxysilane]**

A solution of dansylchloride (1.00 g, 3.7 mmol) in dichloromethane (80 mL) was added to a solution of 3-aminopropyltrimethoxysilane (0.80 mL, 4.6 mmol) and triethylamine (0.60 mL, 4.3 mmol) in the same solvent (20 mL). The mixture was stirred at room temperature for 2 h monitoring the reaction by TLC on silica gel, toluene/ethylacetate 1:1. The solvent was evaporated under reduced pressure and the crude product was purified by flash column chromatography (silica gel, toluene/ethylacetate 1:1) affording 1.15 g (76%) of **1** as a yellow-bright green oil.

1H-NMR (250 MHz, CDCl3, 25°C) : 0.53 (t, *J* = 8.1 Hz, 2H, NCH2CH2C*H2*-Si), 1.55 (m, 2H, NCH2C*H2*CH2-Si), 2.93 (m 8H, NC*H2*CH2CH2-Si and N(C*H3*)2), 3.51 (s, 9H, NCH2CH2CH2-Si-(OC*H3*)3), 5.05 (t, *J* = 5.6 Hz, 1H, N*H*CH2CH2CH2-Si), 7.21 (d, *J* = 7.4 Hz, 1H, C*H*DNS), 7.56 (m, 2H, C*H*DNS), 8.30 (m, 2H, C*H*DNS), 8.57 (d, *J* = 8.3 Hz, 1H, C*H*DNS).

13C-NMR (62.9 MHz, CDCl3, 25 °C) : 6.1 (NCH2CH2*C*H2-Si), 22.8 (NCH2*C*H2CH2-Si), 45.4 (NCH2CH2CH2-Si-(O*C*H3)3), 50.5 (N*C*H2CH2CH2-Si), 115.1 (N(CH3)2), 118.7, 123.2, 125.3, 128.2, 129.0, 129.5, 129.9, 130.3, 134.9, 152.0 (*C*DNS).

Elemental analysis, calculated for C18H28N2O5SSi (412.58): C 52.40, H 6.84, N 6.79, S 7.77; found: C 52.51, H 6.79, N 6.83, S 7.75.

**2.2 Synthesis of derivative 2 [N-(3-(trimethoxisilyl)propyl)-2-Pyridinecarboxamide]**

Thionyl chloride (1.30 mL, 17.9 mmol) was added to a solution of picolinic acid (2.01 g, 16.2 mmol) and triethylamine (6.60 mL, 48.7 mmol) in dichloromethane (100 mL) cooled in an ice bath. The reaction mixture was stirred at 0°C for 10 minutes and at room temperature for 30 minutes. After this time, the dark brown suspension obtained was cooled again in an ice bath, 3-aminopropyltrimethoxysilane (4.20 mL, 24.4 mmol) was added and the reaction mixture was allowed to warm to room temperature under stirring. After 3 hours (monitoring the reaction by TLC on silica gel, CH2Cl2/MeOH 10:0.2) the solvent was removed under reduced pressure and the crude was purified by flash column chromatography (silica gel, CH2Cl2) to obtain 1.65 g of **2** (36%) as a dark brown oil.

1H-NMR (250 MHz, CDCl3, 25°C) : 0.73 (t, *J* = 8.5 Hz, 2H, NCH2CH2C*H2*-Si), 1.76 (m, 2H, NCH2C*H2*CH2-Si), 3.47 (q, 2H, J = 6.7 Hz, NC*H2*CH2CH2-Si), 3.57 (s, 9H, Si-(OC*H3*)3); 7.41 (m, 1H, C*H*Py); 7.83 (m, 1H, C*H*Py); 8.18 (m, 2H, C*H*Py and N*H*CH2CH2CH2-Si ); 8.53 (d, *J* = 4.6 Hz 1H, C*H*Py).

13C-NMR (62.9 MHz, CDCl3, 25°) : 6.6 (NCH2CH2*C*H2-Si), 23.0 (NCH2*C*H2CH2-Si), 41.8 (NCH2CH2CH2-Si-(O*C*H3)3), 50.6 (N*C*H2CH2CH2-Si), 122.2, 126.0, 137.3, 148.0, 150.0 (*C*Py), 164.2 (*C*=O).

Elemental analysis, calculated for C12H20N2O4Si (284.38): C 50.68, H 7.09, N 9.85; found: C 50.59, H 6.98, N 9.93.

**2.3 Preparation of coated silica nanoparticles**

The preparation of the CSNs with **** = 0.50 is reported as an example of the general procedure. All the other CSNs were prepared following the same procedure with different amounts of the precursors **1** and **2** (with the total amount of the two compounds fixed at 0.25 mmol). The effective relative amount of **1** and **2** on the surface of the CSNs was determined by 1H-NMR from the integrals ratio of the signals at 2.86 (8H, **1**) and 3.42 (2H, **2**) (see Figure S6).

53 mg (0.13 mmol) of **1** and 34 mg (0.12 mmol) of **2** were placed in a round bottom flask and then dissolved with 1.25 mL of ethanol, 1.25 mL of water and 1.25 mL of acetic acid. 125 l of a water suspension of silica nanoparticles (LUDOX AS-30 Colloidal Silica, Aldrich) were added. The reaction mixture was warmed at 80°C under stirring for 48 hours. After this time ethanol was evaporated under reduced pressure and solid NaHCO3 was added to the suspension to reach a pH value between 7 and 8. The precipitate was filtered and washed with a borate buffer solution (pH 9.5, 5 × 2 mL) and with water (5 × 2 mL). The solid was dried under vacuum and redissolved with 100 mL of dichloromethane. The organic solution was washed with water (100 mL) and dried over Na2SO4. The crude solid material obtained after the evaporation of the solvent was finally purified by gel permeation chromatography (Sephadex LH20, CH2Cl2). For this preparation a **** value of 0.50 was determined by 1H-NMR analysis (see Figure S6).

1H-NMR (250 MHz, CDCl3, 25°C) : 0.67 (4H, NCH2CH2C*H2*-Si of **1** and **2**); 1.70 (4H, NCH2C*H2*CH2-Si of **1** and **2**); 2.86 (8H, NC*H2*CH2CH2-Si and N(C*H3*)2 of **1**); 3.42 (2H, NC*H2*CH2CH2-Si of **2**); 6.19 (1H, very broad, N*H*CH2CH2CH2-Si of **1**); 7.12, 7.38 (3H, C*H*DNS and C*Hpy*); 7.79 (1H, C*H*Py); 8.22, 8.39, 8.48 (7H, N*H*CH2CH2CH2-Si of **2**, C*H*DNS, C*HPy*).

FT-IR (KBr pellet): 3370 (OH); 2928, 2869 (CH); 1666 (C=O); 1523 (HNCO); 1304 (S=O); 1112 (Si-O) cm-1.

**3. TEM images of CSNs**

**Figure S1:** TEM image of the coated silica nanoparticles with the fluorophore alone (**** = 0), average diameter = 18 nm ( = 3 nm).

**Figure S2:** TEM image of the coated silica nanoparticles with a ligand to fluorophore ratio of 1:15 (**** = 0.06), average diameter = 16 nm, ( = 3 nm).

**Figure S3:** TEM image of the coated silica nanoparticles with a ligand to fluorophore ratio of 2.5:1 (**** = 0.71), average diameter = 19 nm, ( = 3 nm).

**Figure S4:** TEM image of the coated silica nanoparticles with a ligand to fluorophore ratio of 5.2:1(**** = 0.84), average diameter = 18 nm, ( = 3 nm).

**Figure S5:** TEM image of the coated silica nanoparticles with a ligand to fluorophore ratio of 12.5:1(**** = 0.93), average diameter = 19 nm, ( = 3 nm).

**4. NMR, UV-Visible and fluorescence spectra of CSNs**

**Figure S6:** 250 MHz 1H-NMR spectrum of CSNs (**** = 0.50) in CDCl3 at 25 °C.

**Figure S7:** UV-Visible spectra and fluorescence spectra of CSNs (**** = 0.54) Conditions: 10% water/DMSO, HEPES buffer 0.01 M pH 7, 25 °C, exc = 340 nm, em = 520 nm.

**5. Fluorescence titration of CSNs with Cu2+ in the presence of other metal ions**

**Figure S8:** Spectrofluorimetric titration of CSNs, **** = 0.86, (0.03 mg/ml) with Cu(NO3)2 in the absence () and in the presence () of CaCl2, MgCl2, Zn(NO3)2, Cd(NO3)2, CoCl2, Ni(NO3)2, Fe(NO3)2 and Pb(NO3)2 each 50 M. Conditions: 10% water/DMSO, HEPES buffer 0.01 M pH 7, 25 °C, exc = 340 nm, em = 520 nm.
